# Supplementary material for: Myopenia is associated with joint damage in rheumatoid arthritis: a cross‐sectional study
Source: PubMed Central journal article supplement — J Cachexia Sarcopenia Muscle. 2019 Jan 30;10(2):355–67. doi: 10.1002/jcsm.12381 (PMC6463467; doi:10.1002/jcsm.12381), 2019-01-30
Supplement: JCSM-10-355-s001.pdf [file JCSM-10-355-s001.pdf]

Table S1 Comparisons of disease characteristics among RA patients in BMI categorization

| Characteristics                       | Underweight<br>(n=81) | Normal weight<br>(n=265) | Overweight<br>(n=92) | Obese<br>(n=19) | P <sup>#</sup> |
|---------------------------------------|-----------------------|--------------------------|----------------------|-----------------|----------------|
| Female, n (%)                         | 60 (74.1)             | 226 (85.3)               | 76 (82.6)            | 16 (84.2)       | 0.140          |
| Age, yrs, median (IQR)                | 40 (29~58) **         | 50 (42~58)               | 54 (47~62) **        | 51 (47~56)      | <0.001         |
| Disease duration, month, median (IQR) | 36 (18~99)            | 57 (24~118)              | 57 (24~120)          | 72 (36~144)     | 0.379          |
| BF%, %, mean ±SD                      | 21.1 ±7.3***          | 29.0 ±6.6                | 36.3 ±5.1***         | 41.1 ±6.2***    | <0.001         |
| ASMI, kg/m <sup>2</sup> , mean ±SD    | 5.3 ±0.9***           | 5.9 ±0.8                 | 6.5 ±0.8***          | 7.0 ±0.8***     | <0.001         |
| Smoking habits                        |                       |                          |                      |                 | 0.735          |
| Active smoking, n (%)                 | 16 (19.8)             | 34 (12.8)                | 15 (16.3)            | 3 (15.8)        |                |
| Exposure to second hand smoke, n (%)  | 22 (27.2)             | 80 (30.2)                | 30 (32.6)            | 7 (36.8)        |                |
| Without exposure to smoke, n (%)      | 43 (53.1)             | 151 (57.0)               | 47 (51.1)            | 9 (47.4)        |                |
| Positive RF, n (%)                    | 53 (65.4)             | 179 (67.5)               | 55 (59.8)            | 13 (68.4)       | 0.595          |
| Positive ACPA, n (%)                  | 51 (63.0)             | 189 (71.3)               | 62 (67.4)            | 15 (78.9)       | 0.387          |
| Core disease activity indicators      |                       |                          |                      |                 |                |
| Morning stiffness, min, median (IQR)  | 0 (0~10)              | 0 (0~10)                 | 0 (0~30) *           | 0 (0~0) *       | <b>0.023</b>   |
| 28TJC, median (IQR)                   | 2 (0~5)               | 2 (0~5)                  | 3 (0~9)              | 1 (0~3)         | 0.462          |
| 28SJC, median (IQR)                   | 1 (0~4)               | 1 (0~4)                  | 1 (0~4)              | 1 (0~1)         | 0.305          |
| PtGA, median (IQR)                    | 3 (1~5)               | 3 (1~6)                  | 2 (0~5)              | 2 (0~4)         | 0.527          |
| PrGA, median (IQR)                    | 3 (1~5)               | 3 (1~5)                  | 2 (0~5)              | 2 (0~4)         | 0.518          |
| Pain VAS, median (IQR)                | 2 (2~4)               | 2 (2~4)                  | 2 (1~4)              | 2 (1~4)         | 0.712          |
| ESR, (mm/h), median (IQR)             | 27 (12~48)            | 30 (16~50)               | 25 (15~41)           | 27 (13~48)      | 0.620          |
| CRP, (mg/L), median (IQR)             | 4.9 (3.3~18.1)        | 4.6 (3.3~15.9)           | 4.3 (3.3~10.3)       | 3.4 (3.3~7.2)   | 0.786          |
| DAS28-CRP, median (IQR)               | 3.2 (2.1~4.2)         | 3.3 (2.0~4.5)            | 3.2 (2.2~4.4)        | 2.6 (1.7~3.4)   | 0.459          |
| SDAI, median (IQR)                    | 11.1 (4.8~19.6)       | 11.3 (4.3~22.0)          | 11.3 (4.5~24.9)      | 7.3 (2.3~11.5)  | 0.383          |
| CDAI, median (IQR)                    | 10 (4~18)             | 10 (4~20)                | 10 (3~24)            | 7 (2~11)        | 0.410          |
| Functional indicators                 |                       |                          |                      |                 |                |
| HAQ-DI, median (IQR)                  | 0.13 (0~0.81)         | 0.25 (0~0.75)            | 0.25 (0~0.84)        | 0 (0~0.25)      | 0.141          |
| Functional limitation, n (%)          | 14 (17.3)             | 44 (16.6)                | 11 (12.0)            | 1 (5.3)         | 0.413          |
| Radiographic assessment               |                       |                          |                      |                 |                |
| mTSS, median (IQR)                    | 22.0 (5.0~51.0)       | 12.0 (4.0~32.5)          | 11.8 (5.5~32.0)      | 11.5 (5.0~37.0) | 0.411          |
| JSN subscore, median (IQR)            | 7.0 (0.5~22.3) *      | 3.0 (0~12.3)             | 1.8 (0~12.8)         | 1.5 (0~18.5)    | <b>0.038</b>   |
| JE subscore, median (IQR)             | 14.0 (3.5~30.3)       | 9.5 (3.0~21.8)           | 10.0 (4.5~21.8)      | 10.0 (4.0~18.5) | 0.632          |
| Bony erosion, n (%)                   | 75 (92.6)             | 246 (92.8)               | 86 (93.5)            | 19 (100)        | 0.681          |
| RJD, n (%)                            | 53 (65.4)             | 148 (55.8)               | 51 (55.4)            | 11 (57.9)       | 0.468          |

<sup>#</sup> Comparison in four BMI categorization by Kruskal-Wallis test. \*Compared with normal weight patients, \* P<0.05, \*\* P<0.01, \*\*\* P<0.001.

Underweight, BMI<18.5 kg/m<sup>2</sup>; Normal weight, 18.5 kg/m<sup>2</sup>≤BMI<24 kg/m<sup>2</sup>; Overweight, 24 kg/m<sup>2</sup>≤BMI<28 kg/m<sup>2</sup>; Obese, BMI≥28 kg/m<sup>2</sup>; Functional limitation, HAQ-DI>1; Bony erosion, JE subscore>0; RJD, radiographic joint damage (mTSS>10); IQR, interquartile range.
